# Supplementary material
Source: Springer Nature journal article supplement (https://www.springermedizin.de/resource/supplementary/12933_2014_816_MOESM2_ESM.pdf/9539314)

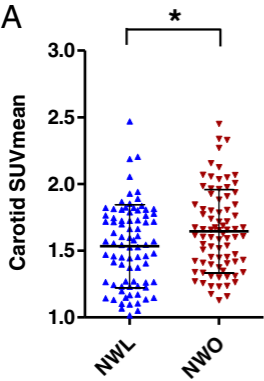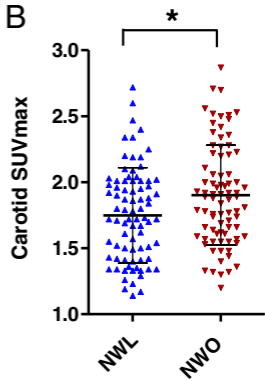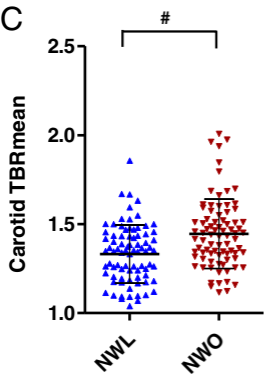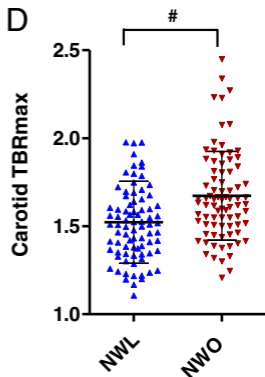

Supplement: MOESM2 [file 9539314]
